Articles of interest in other COB journals

From *Journal of Cell Science*

**Integrins are required for the differentiation of visceral endoderm**

Jie Liu, Xiaowen He, Siobhan A. Corbett, Stephen F. Lowry, Alan M. Graham, Reinhard Fässler and Shaohua Li

Liu, J. et al. 2009. *J. Cell Sci.* doi: 10.1242/jcs.037663

**Integrin  $\alpha 3\beta 1$  inhibits directional migration and wound re-epithelialization in the skin**

Coert Margadant, Karine Raymond, Maaïke Kreft, Norman Sachs, Hans Janssen and Arnoud Sonnenberg

Margadant, C. et al. 2009. *J. Cell Sci.* doi: 10.1242/jcs.029108
